# Supplementary material for: High-capacity polysulfide–polyiodide nonaqueous redox flow batteries with a ceramic membrane
Source: Royal Society of Chemistry journal article supplement (doi:10.1039/d2na00792d), 2022-11-23
Supplement: d2na00792d1.pdf [file d2na00792d1.pdf]

# High-Capacity Polysulfide-Polyiodide Nonaqueous Redox Flow Battery With Ceramic Membrane

*Mao Chen<sup>†</sup> and Hongning Chen<sup>†,\*</sup>*

<sup>†</sup>Chemical Hybrid Energy Novel Laboratory, College of Chemistry and Environmental  
Engineering, Shenzhen University, Shenzhen, 518055, Guangdong, PR China

\*E-mail: hnchen@szu.edu.cn

SI

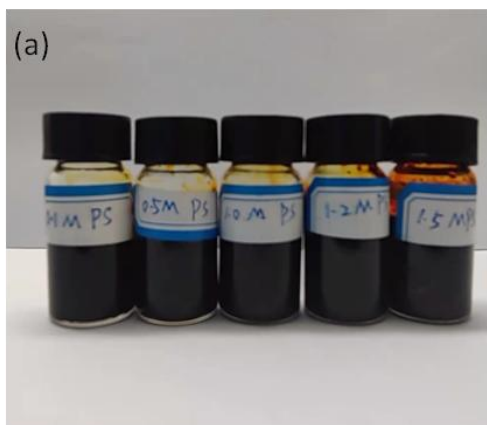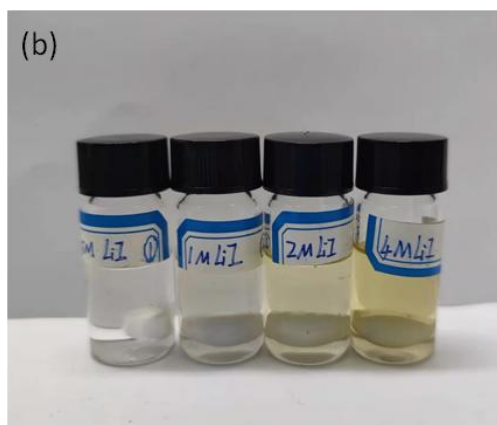

**Figure S1.** Photographs of various concentration of (a) polysulfide and (b) polyiodide.

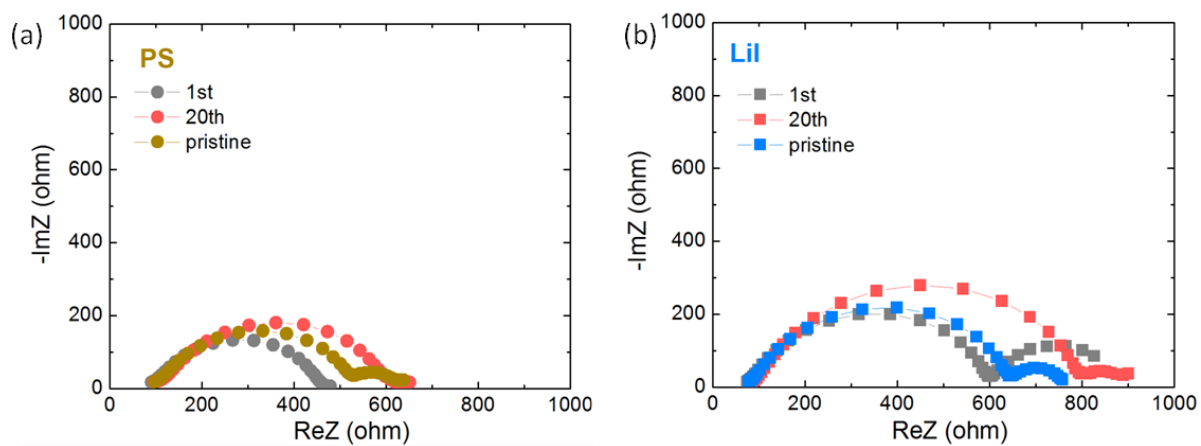

**Figure S2.** EIS results of (a) 0.5 M polysulfide and (b) 1 M polyiodide in Li-based half cells at pristine and after 1st and 20th cycles at  $0.1 \text{ mA cm}^{-2}$ .

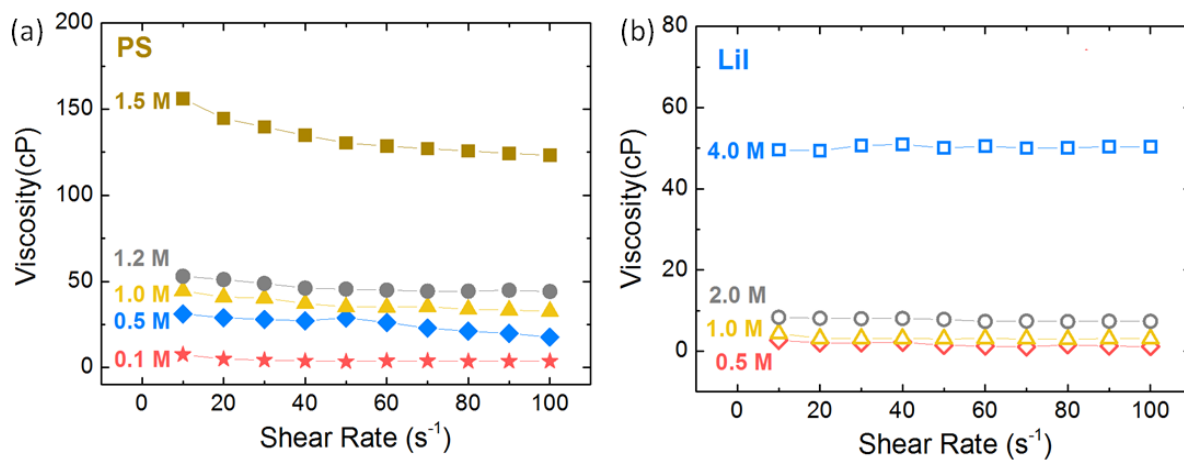

**Figure S3.** Viscosity measurements of various concentration of (a) polysulfide and (b) polyiodide.

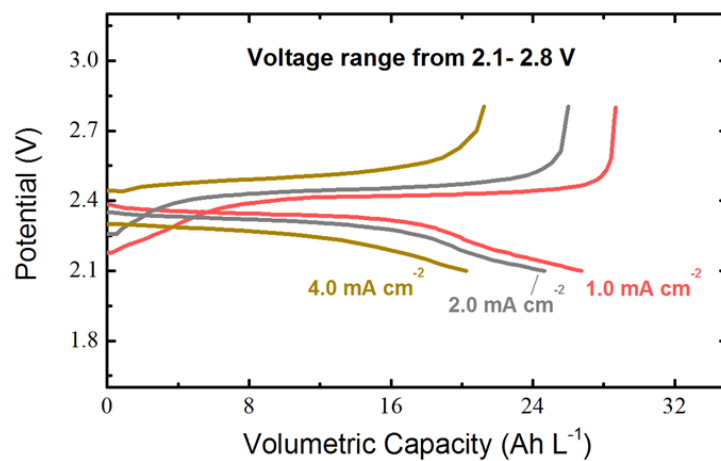

**Figure S4.** First galvanostatic discharge-charge profiles of 0.5 M polysulfide anolyte at various current densities in a Li-based half cell without ceramic membrane.

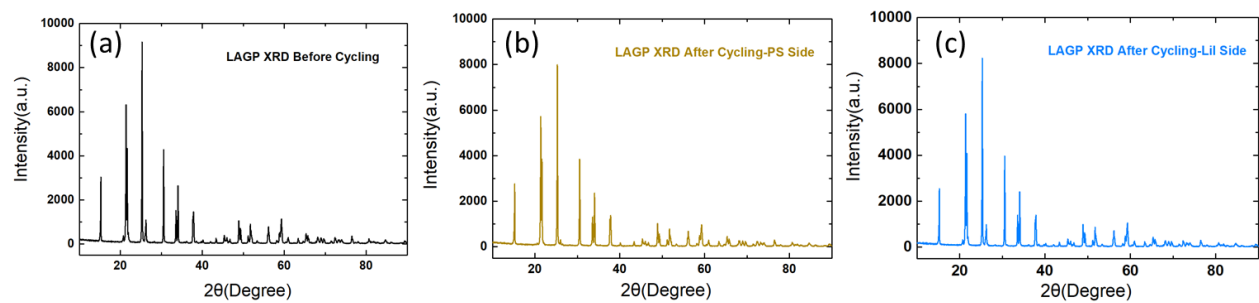

**Figure S5.** XRD results of ceramic membrane (a) before cycling and (b)-(c) after cycling including polysulfide side and polyiodide side.

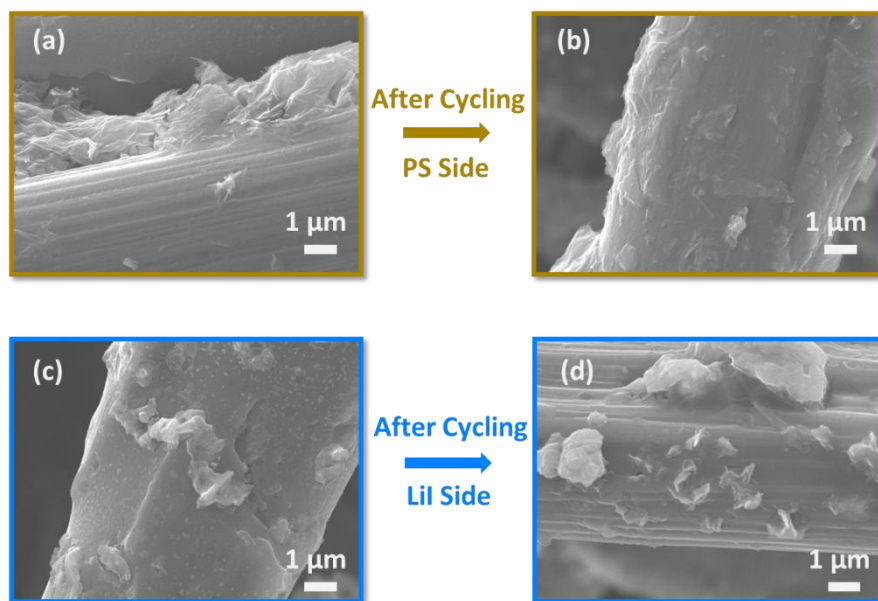

**Figure S6.** SEM images of current collector (a) (c) before cycling and (b) (d) after cycling in both anolyte and catholyte sides.



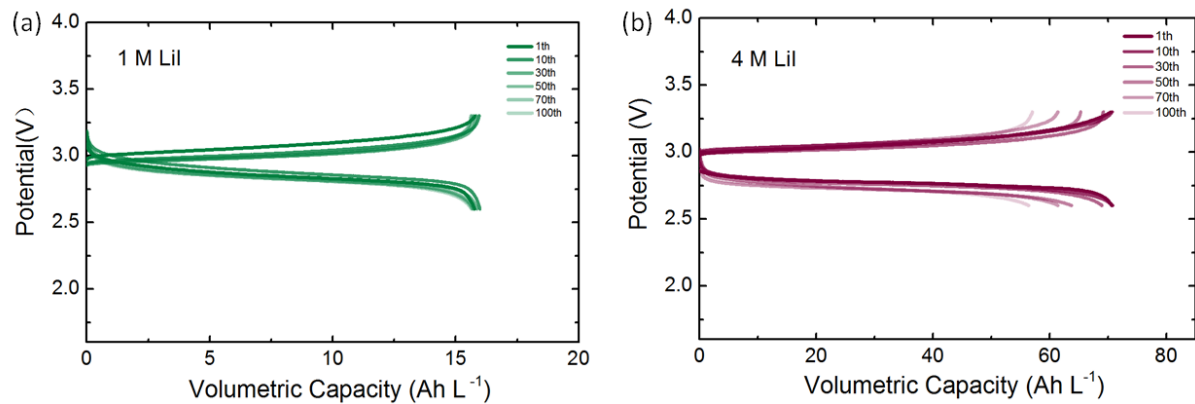

**Figure S7.** Galvanostatic charge-discharge profiles (100 cycles) of (a) 1 M LiI catholyte and (b) 4 M LiI catholyte at  $0.1 \text{ mA cm}^{-2}$  in a Li-based half cell.

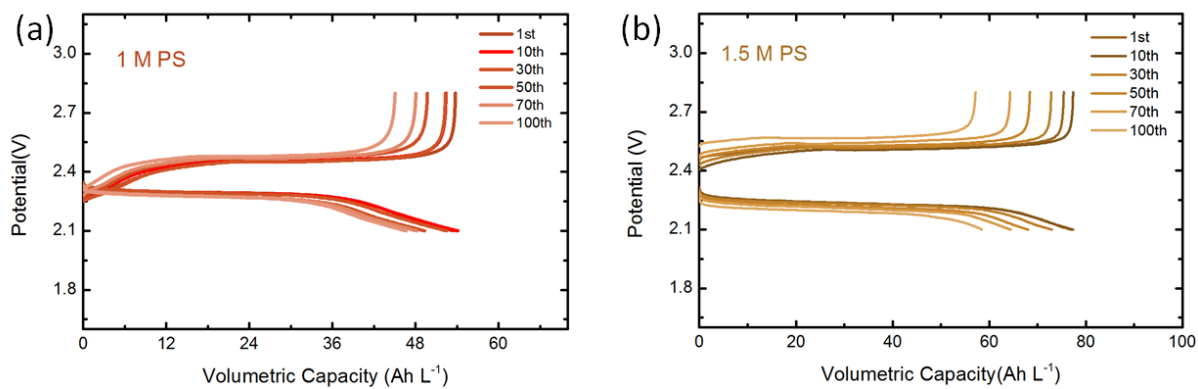

**Figure S8.** Galvanostatic discharge-charge profiles (100 cycles) of (a) 1 M polysulfide anolyte and (b) 1.5 M polysulfide anolyte at  $0.1 \text{ mA cm}^{-2}$  in a Li-based half cell.

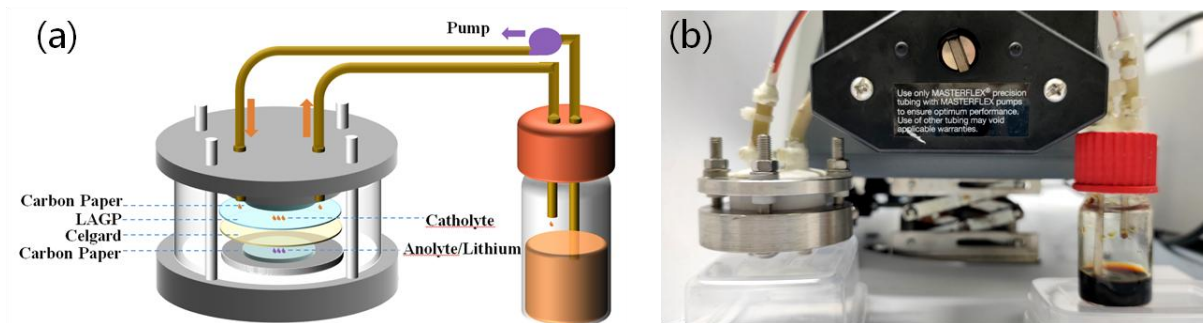

**Figure S9.** (a) Schematic illustration and (b) Photograph of flow cell configuration.
